# Supplementary material for: The crystal structures of three novel lutidinium pamoate salts
Source: Royal Society of Chemistry journal article supplement (doi:10.1039/b814214a), 2008-11-06
Supplement: b814214a.pdf [file b814214a.pdf]

## Supplementary information for: The crystal structures of three novel lutidine pamoate salts

Delia A. Haynes<sup>a,c</sup>, Ze F. Weng<sup>b</sup>, William Jones<sup>a</sup> and W. D. Samuel Motherwell<sup>b</sup>

<sup>a</sup> Pfizer Institute for Pharmaceutical Materials Science, Department of Chemistry, Lensfield Road, Cambridge, UK CB2 1EW.

<sup>b</sup> Cambridge Crystallographic Data Centre, 12 Union Road, Cambridge, UK CB2 1EZ.

<sup>c</sup> present address Department of Chemistry and Polymer Science, Stellenbosch University, P. Bag XI, Matieland, 7602, Republic of South Africa, [dhaynes@sun.ac.za](mailto:dhaynes@sun.ac.za).

### Computational details

The relative stabilities of the gas phase conformations of 4,4'-Methylenebis(3-hydroxy-2-naphthoic acid) and its anionic forms were studied using Density Functional Theory. Molecular structures of **I**, **II** and **III** were geometry optimized from the crystal structure geometries using Becke's three parameter hybrid functional (Becke, 1988) with the Lee-Yang-Parr correlation functional (Lee *et al.*, 1988) (B3LYP), in conjunction with the 6-31G(d,p) basis set. The minimum of each geometry optimisation was checked as indicated by the absence of imaginary vibrational frequencies. A rigid potential energy scan was then performed on each of the optimised geometries by varying the torsion angles  $\tau_1$  and  $\tau_2$  (see Figure 1 for numbering scheme) at the same level of theory. All calculations were performed within the Gaussian 03 package (Frisch *et al.* 2004).

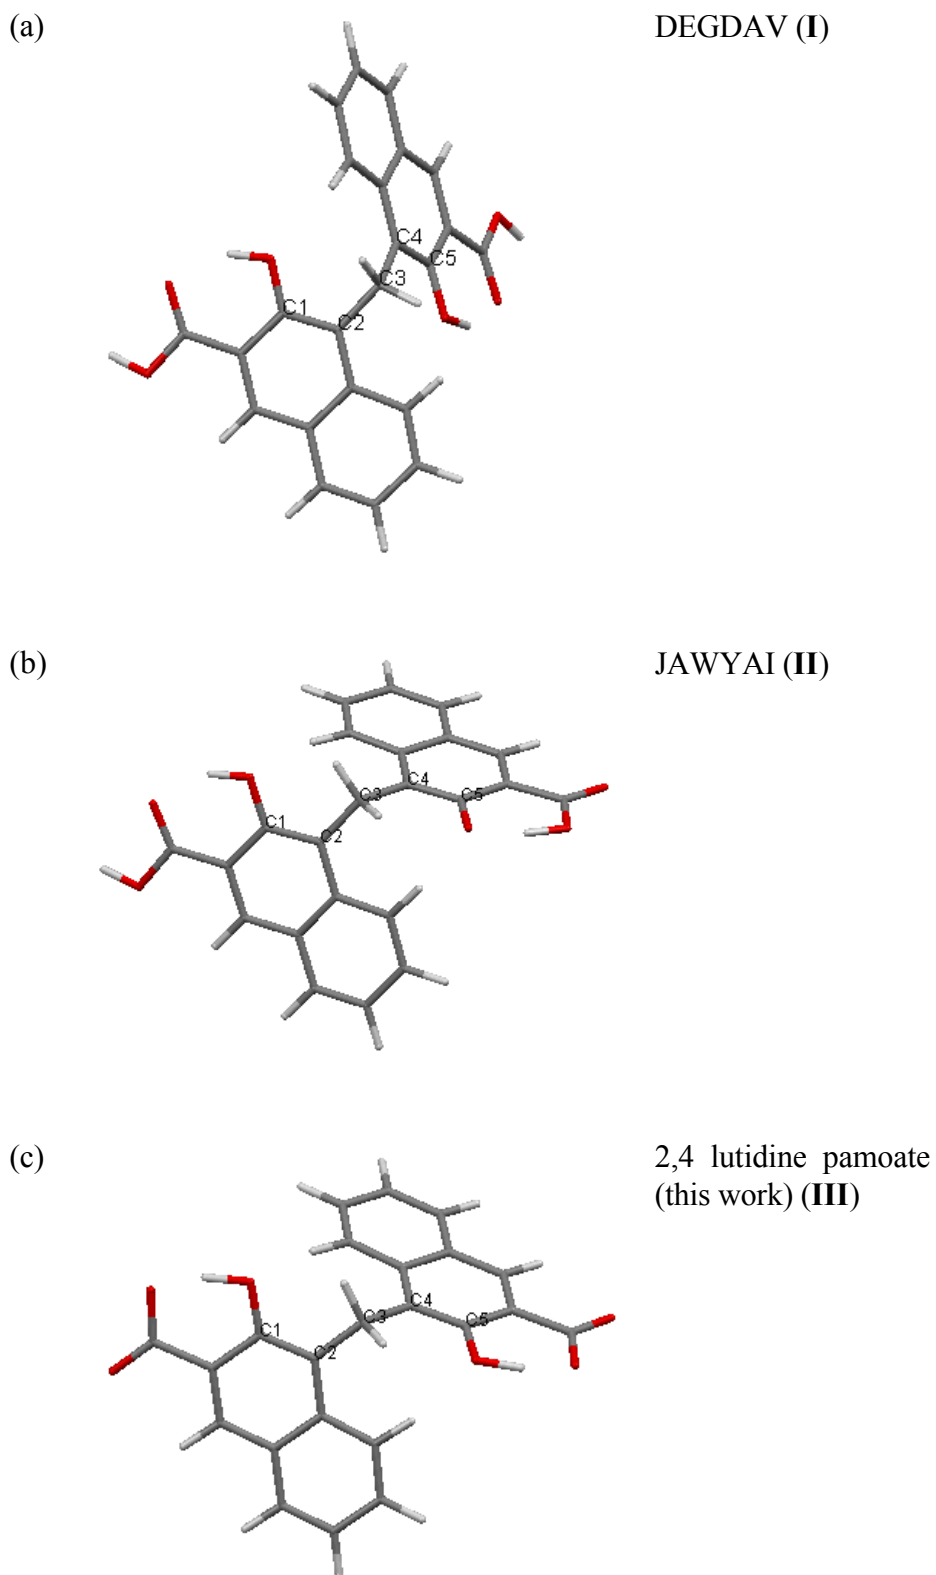

**Figure S1:** Molecular structures of **I**, **II**, and **III** optimised at the B3LYP/6-31G(d,p) level of theory. The torsion angles are defined as  $\tau_1 = \text{C1-C2-C3-C4}$  and  $\tau_2 = \text{C5-C4-C3-C2}$ . For the optimised geometries:  $\tau_1 = -70.5^\circ$ ,  $\tau_2 = -70.5^\circ$  (**I**);  $\tau_1 = -116.7^\circ$ ,  $\tau_2 = -112.6^\circ$  (**II**) and  $\tau_1 = -115.7^\circ$ ,  $\tau_2 = -115.7^\circ$  (**III**).

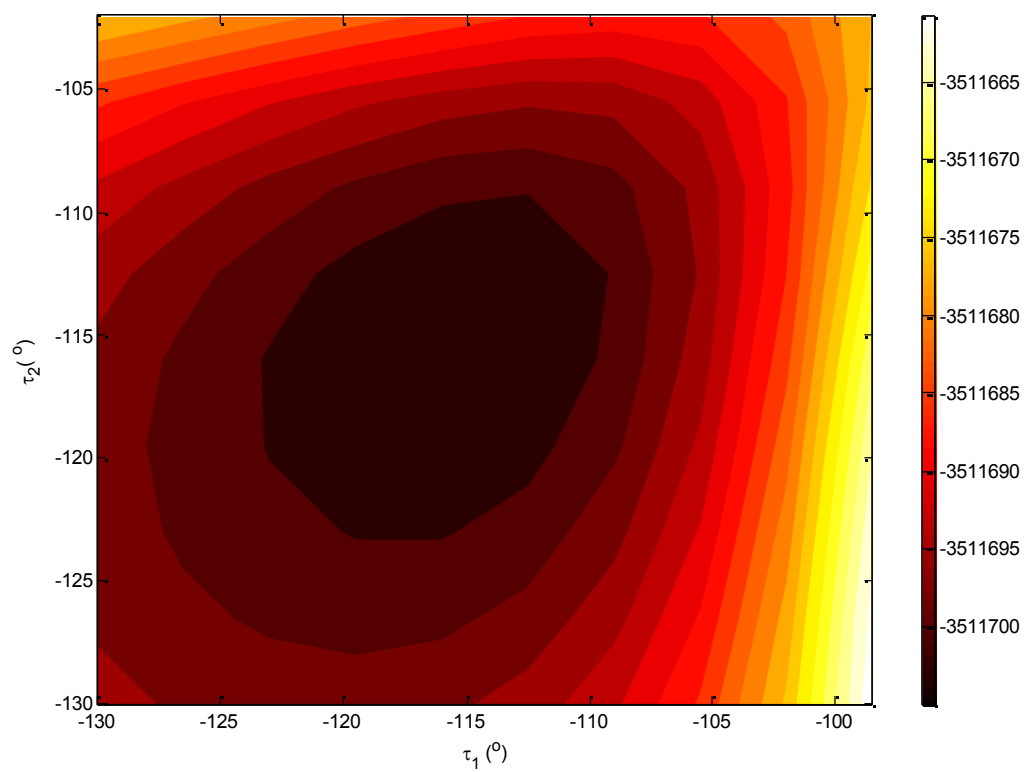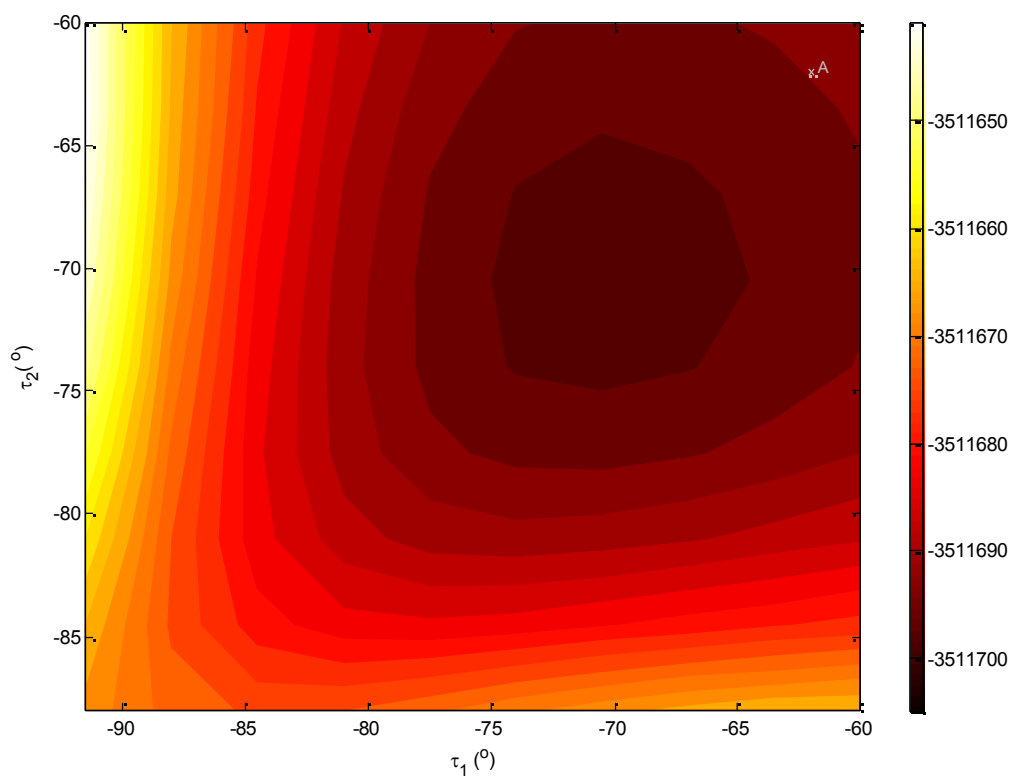

Figure S2a

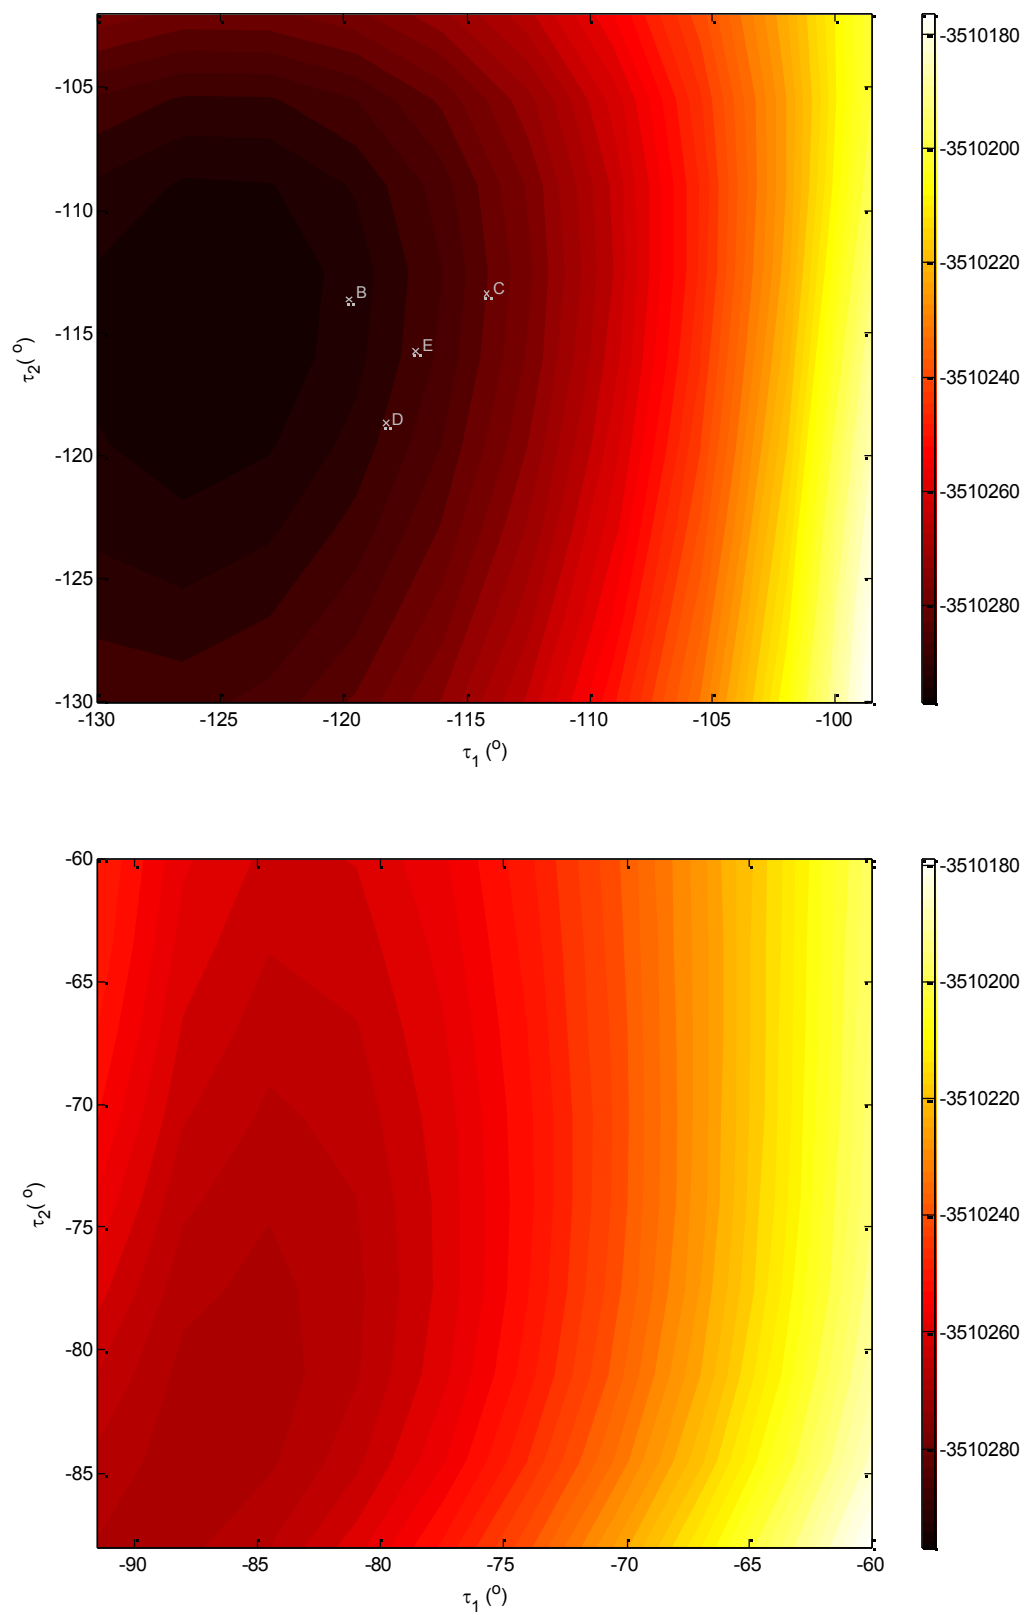

Figure S2b

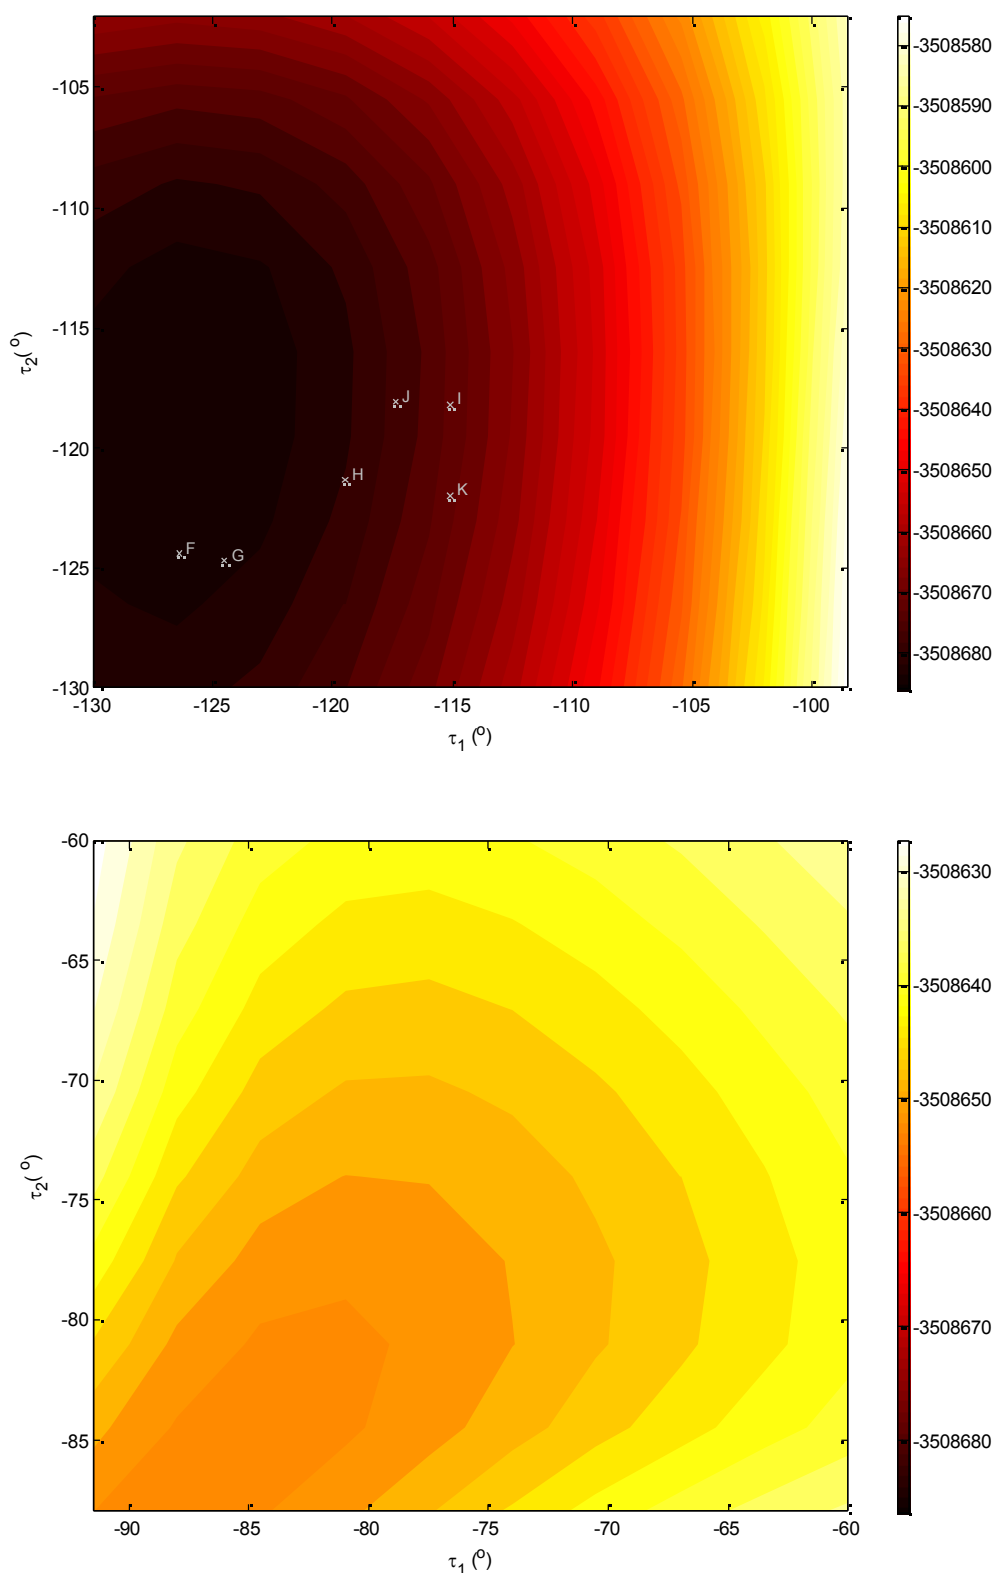

Figure S2c

**Figure S2a-c:** Potential energy surface scan of the optimised geometries of **I** (2a), **II** (2b) and **III** (2c) calculated at the B3LYP/6-31G(d,p) level. Torsion angles  $\tau_1$  and  $\tau_2$  are varied in increments of  $3.5^\circ$ , respectively, while all other bond lengths, bond angles and dihedrals are held fixed. Torsion angle of **I**, **II** and **III** from experimentally determined crystal structures are shown: A (DEGDAV, pamoic acid), B (JAWYAI 3,5-lutidinium pamoate), C (JAWXIP, 2,4-lutidinium pamoate tetrahydrofuran solvate), D (JAWXOV, 2,6-lutidinium pamoate tetrahydrofuran solvate), E (QEXJEJ, 1,10-phenanthroline-1-ium pamoate N,N-dimethylformamide solvate), F (3,4-lutidinium pamoate residue 1), G (3,4-lutidinium pamoate residue 2), H(2,3 lutidinium pamoate), I (2,4-lutidinium pamoate), J (JAWXEL, bis(2,3-lutidinium) pamoate tetrahydrofuran solvate) and K (TABMAK, bis(pyridinium) pamoate). Units are in  $\text{kJmol}^{-1}$  and contours are drawn at  $2.5 \text{ kJmol}^{-1}$  intervals.

**Table S1a-c:** Tabular format of Figures 1a-1c.

**Table S1a**

|              | $\tau_2$ (°) |                |                |                |                |                |                |                |                |                |
|--------------|--------------|----------------|----------------|----------------|----------------|----------------|----------------|----------------|----------------|----------------|
|              |              | -130.00000     | -126.50000     | -123.00000     | -119.50000     | -116.00000     | -112.50000     | -109.00000     | -105.50000     | -102.00000     |
| $\tau_1$ (°) | -130.00000   | -3511694.51931 | -3511695.72704 | -3511696.46218 | -3511696.61971 | -3511695.98959 | -3511694.28302 | -3511690.89612 | -3511684.93624 | -3511674.85432 |
|              | -126.50000   | -3511695.72704 | -3511697.24983 | -3511698.27378 | -3511698.74637 | -3511698.45756 | -3511696.96103 | -3511693.70541 | -3511687.58799 | -3511676.98097 |
|              | -123.00000   | -3511696.46218 | -3511698.27378 | -3511699.66529 | -3511700.47920 | -3511700.53171 | -3511699.32398 | -3511696.25214 | -3511690.10847 | -3511679.16014 |
|              | -119.50000   | -3511696.61971 | -3511698.74637 | -3511700.47920 | -3511701.68693 | -3511702.08075 | -3511701.21434 | -3511698.37880 | -3511692.36640 | -3511681.41807 |
|              | -116.00000   | -3511695.98959 | -3511698.45756 | -3511700.53171 | -3511702.08075 | -3511702.84215 | -3511702.34330 | -3511699.84908 | -3511694.15174 | -3511683.59723 |
|              | -112.50000   | -3511694.28302 | -3511696.96103 | -3511699.32398 | -3511701.21434 | -3511702.34330 | -3511702.21203 | -3511700.19039 | -3511695.09692 | -3511685.40883 |
|              | -109.00000   | -3511690.89612 | -3511693.70541 | -3511696.25214 | -3511698.37880 | -3511699.84908 | -3511700.19039 | -3511698.77262 | -3511694.59808 | -3511686.32775 |
|              | -105.50000   | -3511684.93624 | -3511687.58799 | -3511690.10847 | -3511692.36640 | -3511694.15174 | -3511695.09692 | -3511694.59808 | -3511691.78879 | -3511685.56636 |
|              | -102.00000   | -3511674.85432 | -3511676.95472 | -3511679.13388 | -3511681.39181 | -3511683.59723 | -3511685.40883 | -3511686.32775 | -3511685.56636 | -3511682.20572 |
|              | -98.50000    | -3511658.33992 | -3511659.31136 | -3511660.80789 | -3511662.98706 | -3511665.82260 | -3511669.10447 | -3511672.28133 | -3511674.64428 | -3511675.16938 |

|              | $\tau_2$ (°) |                |                |                |                |                |                |                |                |                |
|--------------|--------------|----------------|----------------|----------------|----------------|----------------|----------------|----------------|----------------|----------------|
|              |              | -88.00000      | -84.50000      | -81.00000      | -77.50000      | -74.00000      | -70.50000      | -67.00000      | -63.50000      | -60.00000      |
| $\tau_1$ (°) | -91.50000    | -3511666.19017 | -3511662.93455 | -3511657.94610 | -3511652.35378 | -3511647.07653 | -3511642.87573 | -3511640.14521 | -3511639.04250 | -3511639.35756 |
|              | -88.00000    | -3511671.46742 | -3511673.33153 | -3511672.80643 | -3511670.94232 | -3511668.52686 | -3511666.21642 | -3511664.40483 | -3511663.27586 | -3511662.69825 |
|              | -84.50000    | -3511673.33153 | -3511679.21265 | -3511681.89066 | -3511682.41576 | -3511681.73313 | -3511680.57791 | -3511679.31767 | -3511678.08368 | -3511676.95472 |
|              | -81.00000    | -3511672.80643 | -3511681.89066 | -3511686.77409 | -3511688.90074 | -3511689.39959 | -3511689.05827 | -3511688.13935 | -3511686.93162 | -3511685.56636 |
|              | -77.50000    | -3511670.94232 | -3511682.41576 | -3511688.90074 | -3511692.18262 | -3511693.57413 | -3511693.75792 | -3511693.10154 | -3511691.92007 | -3511690.34477 |
|              | -74.00000    | -3511668.52686 | -3511681.73313 | -3511689.39959 | -3511693.57413 | -3511695.54326 | -3511695.98959 | -3511695.46449 | -3511694.28302 | -3511692.68146 |
|              | -70.50000    | -3511666.21642 | -3511680.57791 | -3511689.05827 | -3511693.75792 | -3511695.98959 | -3511696.59346 | -3511696.14712 | -3511695.01816 | -3511693.44286 |
|              | -67.00000    | -3511664.40483 | -3511679.31767 | -3511688.13935 | -3511693.10154 | -3511695.46449 | -3511696.14712 | -3511695.75330 | -3511694.67684 | -3511693.23282 |
|              | -63.50000    | -3511663.27586 | -3511678.10994 | -3511686.93162 | -3511691.92007 | -3511694.28302 | -3511695.01816 | -3511694.67684 | -3511693.78417 | -3511692.52393 |
|              | -60.00000    | -3511662.69825 | -3511676.95472 | -3511685.56636 | -3511690.34477 | -3511692.68146 | -3511693.44286 | -3511693.23282 | -3511692.52393 | -3511691.42122 |

**Table S1b**

|              |                | $\tau_2$ (°)   |                |                |                |                |                |                |                |                |
|--------------|----------------|----------------|----------------|----------------|----------------|----------------|----------------|----------------|----------------|----------------|
|              |                | -130.00000     | -126.50000     | -123.00000     | -119.50000     | -116.00000     | -112.50000     | -109.00000     | -105.50000     | -102.00000     |
| $\tau_1$ (°) | -130.00000     | -3510285.83354 | -3510288.64283 | -3510290.95327 | -3510292.65984 | -3510293.50000 | -3510293.13243 | -3510290.92701 | -3510285.83354 | -3510276.25047 |
|              | -126.50000     | -3510286.41115 | -3510289.53550 | -3510292.18725 | -3510294.20889 | -3510295.36411 | -3510295.31160 | -3510293.28996 | -3510288.27526 | -3510278.53465 |
|              | -123.00000     | -3510284.46828 | -3510287.90769 | -3510290.84825 | -3510293.18494 | -3510294.65522 | -3510294.86526 | -3510293.05367 | -3510288.17024 | -3510278.42963 |
|              | -119.50000     | -3510279.95242 | -3510283.65438 | -3510286.88374 | -3510289.48299 | -3510291.21582 | -3510291.66215 | -3510290.06060 | -3510285.38721 | -3510275.96166 |
|              | -116.00000     | -3510272.67979 | -3510276.59178 | -3510280.03119 | -3510282.84047 | -3510284.78334 | -3510285.46597 | -3510284.15322 | -3510279.82115 | -3510271.05198 |
|              | -112.50000     | -3510262.33532 | -3510266.35233 | -3510269.92301 | -3510272.91608 | -3510275.06899 | -3510275.98792 | -3510275.01648 | -3510271.26202 | -3510263.49054 |
|              | -109.00000     | -3510248.39391 | -3510252.43718 | -3510256.06037 | -3510259.13221 | -3510261.46890 | -3510262.70289 | -3510262.23030 | -3510259.28974 | -3510252.88352 |
|              | -105.50000     | -3510230.04167 | -3510233.87490 | -3510237.41932 | -3510240.56992 | -3510243.14291 | -3510244.82323 | -3510245.11204 | -3510243.35295 | -3510238.78458 |
|              | -102.00000     | -3510205.80830 | -3510209.19520 | -3510212.50333 | -3510215.73269 | -3510218.77827 | -3510221.32501 | -3510222.92656 | -3510222.90031 | -3510220.66863 |
| -98.50000    | -3510173.54091 | -3510176.14015 | -3510179.18573 | -3510182.75641 | -3510186.79968 | -3510190.94797 | -3510194.67618 | -3510197.22292 | -3510198.03682 |                |

|              |                | $\tau_2$ (°)   |                |                |                |                |                |                |                |                |
|--------------|----------------|----------------|----------------|----------------|----------------|----------------|----------------|----------------|----------------|----------------|
|              |                | -88.00000      | -84.50000      | -81.00000      | -77.50000      | -74.00000      | -70.50000      | -67.00000      | -63.50000      | -60.00000      |
| $\tau_1$ (°) | -91.50000      | -3510268.11142 | -3510266.03727 | -3510262.91293 | -3510259.34225 | -3510255.79782 | -3510252.69973 | -3510250.31053 | -3510248.63021 | -3510247.55375 |
|              | -88.00000      | -3510268.68903 | -3510269.47668 | -3510268.74154 | -3510267.00871 | -3510264.82954 | -3510262.65038 | -3510260.65500 | -3510258.92217 | -3510257.45189 |
|              | -84.50000      | -3510265.43341 | -3510268.42648 | -3510269.31915 | -3510268.82030 | -3510267.53381 | -3510265.95851 | -3510264.30444 | -3510262.67663 | -3510261.10133 |
|              | -81.00000      | -3510259.02719 | -3510263.64807 | -3510265.66970 | -3510266.03727 | -3510265.45966 | -3510264.38321 | -3510263.07046 | -3510261.65269 | -3510260.23492 |
|              | -77.50000      | -3510249.91670 | -3510255.74531 | -3510258.65962 | -3510259.73607 | -3510259.73607 | -3510259.13221 | -3510258.18703 | -3510257.08432 | -3510255.87659 |
|              | -74.00000      | -3510238.54829 | -3510245.29582 | -3510248.94527 | -3510250.59933 | -3510251.09818 | -3510250.94065 | -3510250.31053 | -3510249.47037 | -3510248.55144 |
|              | -70.50000      | -3510225.36828 | -3510232.82470 | -3510236.97299 | -3510239.07339 | -3510239.96606 | -3510240.09733 | -3510239.75602 | -3510239.23092 | -3510238.67956 |
|              | -67.00000      | -3510210.63922 | -3510218.46321 | -3510222.90031 | -3510225.28951 | -3510226.41848 | -3510226.78605 | -3510226.75979 | -3510226.62852 | -3510226.47099 |
|              | -63.50000      | -3510194.33487 | -3510202.18511 | -3510206.75348 | -3510209.30022 | -3510210.63922 | -3510211.29560 | -3510211.63691 | -3510211.89946 | -3510212.13576 |
| -60.00000    | -3510176.29768 | -3510183.99040 | -3510188.55877 | -3510191.23678 | -3510192.81208 | -3510193.78351 | -3510194.54491 | -3510195.22754 | -3510195.85766 |                |

**Table S1c:**

|  |  | $\tau_2$ (°) |            |            |            |            |            |            |            |            |
|--|--|--------------|------------|------------|------------|------------|------------|------------|------------|------------|
|  |  | -130.00000   | -126.50000 | -123.00000 | -119.50000 | -116.00000 | -112.50000 | -109.00000 | -105.50000 | -102.00000 |

|              |            |                |                |                |                |                |                |                |                |                |
|--------------|------------|----------------|----------------|----------------|----------------|----------------|----------------|----------------|----------------|----------------|
| $\tau_1$ (°) | -130.00000 | -3508679.86770 | -3508681.44300 | -3508682.49320 | -3508682.93954 | -3508682.54571 | -3508681.04918 | -3508677.84607 | -3508672.04371 | -3508662.22434 |
|              | -126.50000 | -3508680.41906 | -3508682.25691 | -3508683.56966 | -3508684.27854 | -3508684.12101 | -3508682.75575 | -3508679.60515 | -3508673.64527 | -3508663.43207 |
|              | -123.00000 | -3508678.63372 | -3508680.73412 | -3508682.30942 | -3508683.22834 | -3508683.28085 | -3508682.07312 | -3508678.92252 | -3508672.91013 | -3508662.48689 |
|              | -119.50000 | -3508674.43292 | -3508676.76961 | -3508678.58121 | -3508679.71017 | -3508679.92021 | -3508678.79125 | -3508675.71941 | -3508669.70702 | -3508659.36255 |
|              | -116.00000 | -3508667.63287 | -3508670.17961 | -3508672.14873 | -3508673.43523 | -3508673.75029 | -3508672.72634 | -3508669.73327 | -3508663.90466 | -3508653.98027 |
|              | -112.50000 | -3508657.91852 | -3508660.57028 | -3508662.64442 | -3508664.00968 | -3508664.42976 | -3508663.48458 | -3508660.67530 | -3508655.21426 | -3508646.07752 |
|              | -109.00000 | -3508644.76477 | -3508647.39027 | -3508649.46441 | -3508650.88218 | -3508651.35477 | -3508650.56712 | -3508648.07290 | -3508643.21572 | -3508635.28671 |
|              | -105.50000 | -3508627.22643 | -3508629.66814 | -3508631.61101 | -3508633.00253 | -3508633.60639 | -3508633.18631 | -3508631.32221 | -3508627.46272 | -3508621.13527 |
|              | -102.00000 | -3508603.88573 | -3508605.88111 | -3508607.58769 | -3508609.00546 | -3508610.00315 | -3508610.37072 | -3508609.63558 | -3508607.40390 | -3508603.20310 |
|              | -98.50000  | -3508572.72105 | -3508573.98129 | -3508575.42531 | -3508577.18440 | -3508579.12727 | -3508580.99137 | -3508582.25161 | -3508582.40914 | -3508581.01763 |

|              | $\tau_2$ (°) |                |                |                |                |                |                |                |                |                |
|--------------|--------------|----------------|----------------|----------------|----------------|----------------|----------------|----------------|----------------|----------------|
|              | -88.00000    | -84.50000      | -81.00000      | -77.50000      | -74.00000      | -70.50000      | -67.00000      | -63.50000      | -60.00000      |                |
| $\tau_1$ (°) | -91.50000    | -3508651.74860 | -3508648.54549 | -3508644.47596 | -3508640.09138 | -3508635.81181 | -3508632.08360 | -3508629.14304 | -3508626.96388 | -3508625.46734 |
|              | -88.00000    | -3508652.85131 | -3508652.03740 | -3508649.91075 | -3508647.02270 | -3508643.84584 | -3508640.80026 | -3508638.06974 | -3508635.75930 | -3508633.76392 |
|              | -84.50000    | -3508652.03740 | -3508653.00884 | -3508652.22119 | -3508650.33083 | -3508647.86286 | -3508645.28987 | -3508642.76939 | -3508640.38018 | -3508638.12225 |
|              | -81.00000    | -3508649.93700 | -3508652.24744 | -3508652.40497 | -3508651.22350 | -3508649.30688 | -3508647.10146 | -3508644.76477 | -3508642.42807 | -3508640.06512 |
|              | -77.50000    | -3508647.04895 | -3508650.33083 | -3508651.22350 | -3508650.61963 | -3508649.14935 | -3508647.20648 | -3508645.07983 | -3508642.74313 | -3508640.32767 |
|              | -74.00000    | -3508643.87210 | -3508647.88911 | -3508649.33314 | -3508649.14935 | -3508647.99413 | -3508646.31381 | -3508644.23967 | -3508641.92923 | -3508639.54002 |
|              | -70.50000    | -3508640.82652 | -3508645.28987 | -3508647.10146 | -3508647.23274 | -3508646.31381 | -3508644.73851 | -3508642.76939 | -3508640.48520 | -3508638.17476 |
|              | -67.00000    | -3508638.12225 | -3508642.79564 | -3508644.79102 | -3508645.07983 | -3508644.26592 | -3508642.76939 | -3508640.82652 | -3508638.62110 | -3508636.44193 |
|              | -63.50000    | -3508635.78556 | -3508640.40644 | -3508642.42807 | -3508642.74313 | -3508641.92923 | -3508640.48520 | -3508638.62110 | -3508636.57321 | -3508634.55157 |
|              | -60.00000    | -3508633.79018 | -3508638.14851 | -3508640.06512 | -3508640.32767 | -3508639.54002 | -3508638.17476 | -3508636.44193 | -3508634.55157 | -3508632.63496 |



**Table S2:** Torsion angle of **I**, **II** and **III** from experimentally determined crystal structures. Definitions of torsion angles as  $\tau_1$  and  $\tau_2$  are given in Figure 1.

| Molecule | Refcode             | Charge | Chemical name                                                          | $\tau_1$ | $\tau_2$ |
|----------|---------------------|--------|------------------------------------------------------------------------|----------|----------|
| A        | DEGDAV              | 0      | 4,4'-Methylenebis(3-hydroxy-2-naphthoic acid)                          | -62.0    | -62.0    |
| B        | JAWYAI              | -1     | 3,5-Lutidinium pamoate                                                 | -119.8   | -113.6   |
| C        | JAWXIP              | -1     | 2,4-Lutidinium pamoate tetrahydrofuran solvate                         | -114.2   | -113.4   |
| D        | JAWXOV              | -1     | 2,6-Lutidinium pamoate tetrahydrofuran solvate                         | -118.3   | -118.7   |
| E        | QEXJEJ              | -1     | 1,10-Phenanthroline-1-ium pamoate N,N-dimethylformamide solvate        | -117.1   | -115.7   |
| F        | this work residue 1 | -2     | 3,4-Lutidinium pamoate                                                 | -126.4   | -124.4   |
| G        | this work residue 2 | -2     | 3,4-Lutidinium pamoate                                                 | -124.5   | -124.7   |
| H        | this work           | -2     | 2,3-Lutidinium pamoate                                                 | -119.5   | -121.3   |
| I        | this work           | -2     | 2,4-Lutidinium pamoate                                                 | -115.1   | -118.2   |
| J        | JAWXEL              | -2     | bis(2,3-Lutidinium) pamoate tetrahydrofuran solvate                    | -117.4   | -118.1   |
| K        | TABMAK              | -2     | bis(Pyridinium) 4,4'-methylene-bis(3-hydroxy-2-naphthalenecarboxylate) | -115.1   | -122.0   |
